# Supplementary material for: Metabolic flexibility of mitochondrial respiratory chain disorders predicted by computer modelling
Source: PubMed Central journal article supplement (PMC5115619; doi:10.1016/j.mito.2016.09.003), 2016-11

# Folate Shuttle

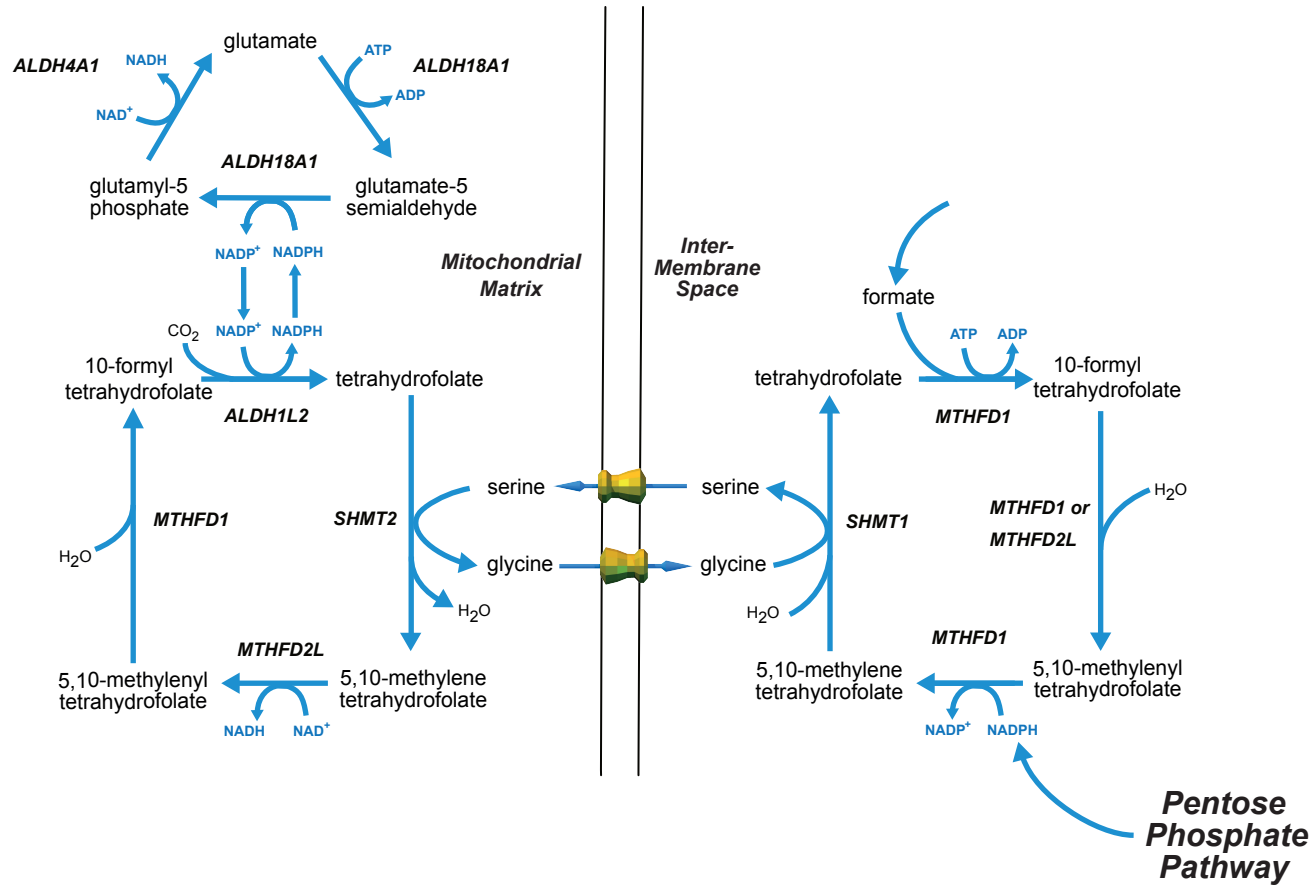

Supplement: mmc4.pdf [file mmc4.pdf]
